# Supplementary material for: Indicators to evaluate organisational knowledge brokers: a scoping review
Source: Springer Nature journal article supplement (doi:10.1186/s12961-020-00607-8), 2020-08-24
Supplement: MOESM1 [file 18309614]

## Additional File 1 Search strategy used to search Medline and Global Health databases

1. exp "Diffusion of Innovation"/
2. exp Information Dissemination/
3. ((knowledge or evidence-based or research\*) adj2 (action or collaborat\* or implement\* or adopt\* or applicat\* or broker\* or coproduction or diffusion or dissemination or exchang\* or mobilization or mobilisation or network\* or platform\* or shar\* or use\* or using or synthes\* or transfer\* or translat\* or uptake or utilization or utilisation)).ti,ab.
4. (evidence informed or knowledge intermediar\* or "linkage and exchange").ti,ab.
5. 1 or 2 or 3 or 4
6. exp Decision Making/
7. exp Decision Making, Organizational/
8. exp Policy Making/
9. exp Health Planning Organizations/
10. (Decision mak\* or Health systems strengthening or Policy\* or Policies).ti,ab.
11. 6 or 7 or 8 or 9 or 10
12. exp Evaluation Studies/
13. exp Program Evaluation/
14. exp Capacity Building/
15. ((change\* or measur\* or monitor\* or improv\* or increas\* or evaluat\* or build\* or achiev\*) adj3 (capacity or evidence-informed or knowledge translation or knowledge use\* or evidence use\* or research use\*)).ti,ab.
16. 12 or 13 or 14 or 15
17. 5 and 11 and 16
