# Supplementary material for: Indicators to evaluate organisational knowledge brokers: a scoping review
Source: Springer Nature journal article supplement (doi:10.1186/s12961-020-00607-8), 2020-08-24
Supplement: MOESM2 [file 18309614]

Additional File 2 Study characteristics of the 32 eligible studies

| <b>KT Model</b> | <b>Study</b>                                                                                                                                                                                        | <b>Country</b>                                                                                                                            | <b>KT capacity building activity/level</b> | <b>Evaluation method</b>                                          | <b>Target audience</b>                                                                                  |
|-----------------|-----------------------------------------------------------------------------------------------------------------------------------------------------------------------------------------------------|-------------------------------------------------------------------------------------------------------------------------------------------|--------------------------------------------|-------------------------------------------------------------------|---------------------------------------------------------------------------------------------------------|
| Push efforts    | Aikins et al 2012: Establishing and sustaining research partnerships in Africa: a case study of the UK-Africa Academic Partnership on Chronic Disease                                               | United Kingdom & Africa                                                                                                                   | Research partnership<br>-<br>Regional      | [none reported]                                                   | researchers, policymakers                                                                               |
| Push efforts    | Angulo-Tuesta et al 2016: Impact of health research on advances in knowledge, research capacity-building and evidence-informed policies: a case study on maternal mortality and morbidity in Brazil | Brazil                                                                                                                                    | Research funding<br>-<br>Systems           | Case Study/Document review/citation analysis                      | Researchers                                                                                             |
| Push efforts    | Bartlett et al 2008: 'I went in feeling like a student and came out feeling like a researcher': An evaluation of the first Australian Masterclass for Emerging Researchers in Ageing                | Australia                                                                                                                                 | Academic program<br>-<br>Individual        | Pre/Post Intervention Questionnaire                               | researchers                                                                                             |
| Push efforts    | Cole et al 2016: Implementing a national health research for development platform in a low-income country – a review of Malawi's Health Research Capacity Strengthening Initiative                  | Malawi                                                                                                                                    | Research platform<br>-<br>Systems          | Document review/Interviews                                        | Researchers & research institutions                                                                     |
| Push efforts    | UNDP/UNFPA/WHO/WORLD BANK Special Programme of Research, Development and Research Training in Human Reproduction (HRP)                                                                              | WHO Headquarters & participating countries (Ethiopia, Mozambique, Nigeria, Uganda, Zambia, South Africa, Kenya, Maldives, Fiji, Viet Nam, | Research platform<br>-<br>Regional         | Case Study (lesson learning, interviews, document review, survey) | health-care providers, policy-makers, scientists, clinicians and consumer and community representatives |

| <b>KT Model</b>   | <b>Study</b>                                                                                                                                                  | <b>Country</b>                           | <b>KT capacity building activity/level</b>                  | <b>Evaluation method</b>                                           | <b>Target audience</b>                                                                                                                       |
|-------------------|---------------------------------------------------------------------------------------------------------------------------------------------------------------|------------------------------------------|-------------------------------------------------------------|--------------------------------------------------------------------|----------------------------------------------------------------------------------------------------------------------------------------------|
|                   | 2008: Knowledge synthesis and transfer: a case-study                                                                                                          | the United Republic of Tanzania, China)  |                                                             |                                                                    |                                                                                                                                              |
| Push efforts      | Kwan et al 2007: A systematic evaluation of payback of publicly funded health and health services research in Hong Kong                                       | Hong Kong, Special Administrative Region | Research fund<br>-<br>Systems                               | Research Payback Evaluation                                        | professionals engaged in health research                                                                                                     |
| Push efforts      | Mahmood et al 2011: Strategies for capacity building for health research in Bangladesh: Role of core funding and a common monitoring and evaluation framework | Bangladesh                               | Funding and complex intervention<br><br>-<br>Organizational | Case Study                                                         | researchers & policymakers, donors, & management, academic institutions, development agencies                                                |
| Push efforts      | Ottoson et al 2009: Policy-Contribution Assessment and Field-Building Analysis of the Robert Wood Johnson Foundation's Active Living Research Program         | The United States of America             | Research funding<br>-<br>Systems                            | Questionnaire, Interviews, Document review, Bibliometric Analysis, | [none reported]                                                                                                                              |
| Push efforts      | Sallis et al 2009: The Active Living Research Program: Six Years of Grantmaking                                                                               | The United States of America             | Research funding<br>-<br>Systems                            | Questionnaire, Interviews, Document review, Bibliometric Analysis, | [none reported]                                                                                                                              |
| User-pull efforts | Araujo de Carvalho et al 2015: Informing evidence-based policies for ageing and health in Ghana                                                               | Ghana                                    | Technical assistance<br>-<br>Organizational                 | Case study/Document review                                         | experts, policymakers, representatives from key ministries, the Ghana Health Service, teaching hospitals, professional bodies, NGOs and WHO. |
| User-pull efforts | The CIPHER Investigators 2014: Supporting Policy In health with Research: an Intervention Trial (SPIRIT)—protocol for a stepped wedge trial                   | Australia                                | Complex intervention<br>-<br>Organizational                 | Interviews, questionnaire, document review                         | Health policy agencies                                                                                                                       |

| <b>KT Model</b>      | <b>Study</b>                                                                                                                                                                             | <b>Country</b>      | <b>KT capacity building activity/level</b> | <b>Evaluation method</b>                                     | <b>Target audience</b>                                                  |
|----------------------|------------------------------------------------------------------------------------------------------------------------------------------------------------------------------------------|---------------------|--------------------------------------------|--------------------------------------------------------------|-------------------------------------------------------------------------|
| User-pull efforts    | Neves et al 2014: Evaluation of the international forum on evidence informed health policymaking: Addis Ababa, Ethiopia – 27 to 31 August 2012                                           | Ethiopia            | Conference<br>-<br>Individual              | Post Intervention Questionnaire (qualitative & quantitative) | Researchers, policymakers, journalists                                  |
| User-pull efforts    | Peirson et al 2013: The Registry of Knowledge Translation Methods and Tools: a resource to support evidence-informed public health                                                       | Canada              | Online resources<br>Individuals            | Questionnaire, Interviews, Google Analytics                  | Policy & decision makers                                                |
| User-pull efforts    | Uneke et al 2011: Enhancing health policymakers' capacity to use information and communication technology in Nigeria                                                                     | Nigeria             | Workshop<br>-<br>Individual                | Pre/Post Intervention Questionnaire                          | policymakers and other health decision makers, health researchers, NGOs |
| User-pull efforts    | Uneke et al 2015: Improving Nigerian health policymakers' capacity to access and utilize policy relevant evidence: outcome of information and communication technology training workshop | Nigeria             | Workshop<br>-<br>Individual                | Pre/Post Intervention Questionnaire                          | policymakers                                                            |
| User-pull efforts    | Uneke et al 2015: Enhancing the Capacity of Policy-Makers to Develop Evidence-Informed Policy Brief on Infectious Diseases of Poverty in Nigeria                                         | Nigeria             | Workshop & Mentoring<br>-<br>Individual    | Pre/Post Intervention Questionnaire                          | policymakers                                                            |
| Linkage and exchange | Alberta Health Services 2014: Knowledge Translation Evaluation Planning Guide                                                                                                            | Canada              | Research platform<br>-<br>Systems          | [none reported]                                              | Research partnerships                                                   |
| Linkage and exchange | ESSENCE on Health Research 2016: Planning, Monitoring and Evaluation                                                                                                                     | [General framework] | Research platform<br>-                     | Document review, site visits, questionnaires, interviews     | funders of research capacity efforts                                    |

| <b>KT Model</b>      | <b>Study</b>                                                                                                                               | <b>Country</b>                                                | <b>KT capacity building activity/level</b>  | <b>Evaluation method</b>                                                                           | <b>Target audience</b>                                                                                        |
|----------------------|--------------------------------------------------------------------------------------------------------------------------------------------|---------------------------------------------------------------|---------------------------------------------|----------------------------------------------------------------------------------------------------|---------------------------------------------------------------------------------------------------------------|
|                      | Framework for Research Capacity Strengthening                                                                                              |                                                               | Individual,<br>Organizational, Systems      |                                                                                                    |                                                                                                               |
| Linkage and exchange | Galluzzo et al 2012: Alcohol and older people. The European project VINTAGE: Good Health into Older Age. Design, methods and major results | Europe                                                        | Network<br>-<br>Regional                    | Document review,<br>questionnaire                                                                  | healthcare professionals,<br>policymakers, policy making organizations,<br>researchers, academic institutions |
| Linkage and exchange | Hawkes et al 2016: Strengthening capacity to apply health research evidence in policy making: experience from four countries               | Bangladesh, Gambia, Nigeria (India excluded; community level) | Complex intervention<br>-<br>Organizational | Document review,<br>interviews, pre/post questionnaire                                             | policymakers & policy influencers, researchers                                                                |
| Linkage and exchange | Kothari et al 2011: Indicators at the interface: managing policymaker-researcher collaboration                                             | Canada                                                        | Research partnerships<br>-<br>Systems       | not evaluation<br>indicator development through literature review,<br>interviews, and focus groups | research partnerships                                                                                         |
| Linkage and exchange | Langlois et al 2016: Enhancing evidence informed policymaking in complex health systems: lessons from multi-site collaborative approaches  | South Africa & Cameroon                                       | Buddying<br>-<br>Individual                 | Realist Evaluation (Document review,<br>interviews, focus group)                                   | sub-national policymakers & researchers                                                                       |
| Linkage and exchange | Murnaghan et al 2013: Knowledge exchange systems for youth health and chronic disease prevention: a tri-provincial case study              | Canada                                                        | Network<br>-<br>Systems                     | Case Study, Lessons Learned (documents,<br>surveys, interviews, focus groups)                      | stakeholders involved in practice, policy, or research                                                        |
| Integrated efforts   | Conklin et al 2008: A Model for Evaluating Knowledge Exchange in a Network Context                                                         | Canada                                                        | KT Network & Brokering<br>-<br>Systems      | Case study: Literature review,<br>interviews,<br>questionnaire                                     | caregivers, policy-makers,<br>researchers                                                                     |

| <b>KT Model</b>    | <b>Study</b>                                                                                                                                                                             | <b>Country</b>                                                                                                    | <b>KT capacity building activity/level</b> | <b>Evaluation method</b>                                                                  | <b>Target audience</b>                                                   |
|--------------------|------------------------------------------------------------------------------------------------------------------------------------------------------------------------------------------|-------------------------------------------------------------------------------------------------------------------|--------------------------------------------|-------------------------------------------------------------------------------------------|--------------------------------------------------------------------------|
| Integrated efforts | Ekirapa-Kiracho et al 2014: Evaluation of a health systems knowledge translation network for Africa (KTNET): a study protocol                                                            | Rwanda, Senegal, South Africa, Burundi, the Democratic Republic of Congo, Ghana, Uganda, Ethiopia                 | Technical Assistance<br>-<br>Systems       | Pre/Post Intervention Questionnaire, Interviews, Usage Analytics, Social Network Analysis | 8 participating research coalitions                                      |
| Integrated efforts | El-Jardali et al 2014: Capturing lessons learned from evidence-to-policy initiatives through structured reflection                                                                       | Argentina, Bangladesh, Nigeria, Burkina Faso, Cameroon, Central African Republic, Ethiopia, Uganda, Sudan, Zambia | KTP<br>-<br>Systems                        | Interviews, Document review, Observations                                                 | KT platform leaders, policymakers, stakeholders                          |
| Integrated efforts | Johnson et al 2010: Procedures Manual for Evaluating Knowledge-Translation Platforms in Low- and Middle- Income Countries                                                                | Canada                                                                                                            | KTP<br>-<br>Systems                        | Case Study (surveys, media analysis, document review, usage analytics)                    | policymakers, stakeholders, researchers, participating KTPs & affiliates |
| Integrated efforts | Kothari et al 2014: Evaluation of partnerships in a transnational family violence prevention network using an integrated knowledge translation and exchange model: a mixed methods study | Canada, the United States of America, Asia, Europe, Australia                                                     | Network<br>-<br>Systems                    | Questionnaire, Interviews                                                                 | researchers & knowledge users, trainees                                  |
| Integrated efforts | Mavoa et al 2012: Knowledge exchange in the Pacific: The TROPIC (Translational Research into Obesity Prevention Policies for Communities) project                                        | Fiji                                                                                                              | Knowledge broker<br>-<br>Organizational    | Interviews, questionnaire, process diaries,                                               | Researchers, policymakers, policymaking organizations, advocacy groups   |
| Integrated efforts | Ongolo-Zogo et al 2014: Initiatives supporting evidence informed health system policymaking in Cameroon and Uganda: a comparative historical case study                                  | Cameroon, Uganda                                                                                                  | KTP<br>-<br>Systems                        | Case Study (document review & questionnaire)                                              | policymakers, researchers, civil society, media                          |

| <b>KT Model</b>    | <b>Study</b>                                                                                                                                  | <b>Country</b> | <b>KT capacity building activity/level</b> | <b>Evaluation method</b>              | <b>Target audience</b>                                                                      |
|--------------------|-----------------------------------------------------------------------------------------------------------------------------------------------|----------------|--------------------------------------------|---------------------------------------|---------------------------------------------------------------------------------------------|
| Integrated efforts | Waqa et al 2013: Participants' perceptions of a knowledge-brokering strategy to facilitate evidence-informed policy-making in Fiji            | Fiji           | Knowledge broker<br>-<br>Organizational    | feedback questionnaire and interviews | academic institutions, research centers, policymaking experts, government departments, NGOs |
| Integrated efforts | Waqa et al 2013: Knowledge brokering between researchers and policymakers in Fiji to develop policies to reduce obesity: a process evaluation | Fiji           | Knowledge broker<br>-<br>Organizational    | feedback questionnaire and interviews | academic institutions, research centers, policymaking experts, government departments, NGOs |
